# Supplementary material
Source: HighWire-hosted journal article supplement (https://bmjopen.bmj.com/content/10/11/e040216)
Supplement: inline-supplementary-material-2 [file inline-supplementary-material-2.pdf]

---

Supplementary Table 1. Summary of medications that respondents report taking during self-isolation

---

| <b>Medication</b> | <b>n=236 (%)</b> |
|-------------------|------------------|
| Paracetamol       | 195 (82.6%)      |
| NSAIDs            | 33 (14.0%)       |
| Herbal            | 20 (8.5%)        |
| Phenylephrine     | 19 (8.1%)        |
| Inhaler           | 17 (7.2%)        |
| Antibiotics       | 15 (6.4%)        |
| Codeine           | 10 (4.2%)        |
| Steroid           | 7 (3.0%)         |
| Other             | 20 (8.5%)        |
